# Supplementary material
Source: PubMed Central journal article supplement (PMC3901321)
Supplement: Supp_Figure1.pdf [file Supp_Figure1.pdf]

## Supplementary Data

### References

1. Appenzeller-Herzog C, Riemer J, Christensen B, Sorensen ES, and Ellgaard L. A novel disulphide switch mechanism in Ero1 alpha balances ER oxidation in human cells. *EMBO J* 27: 2977–2987, 2008.
2. Wang X, Wang L, Wang Xe, Sun F, and Wang CC. Structural insights into the peroxidase activity and inactivation of human peroxiredoxin 4. *Biochem J* 441: 113–118, 2012.

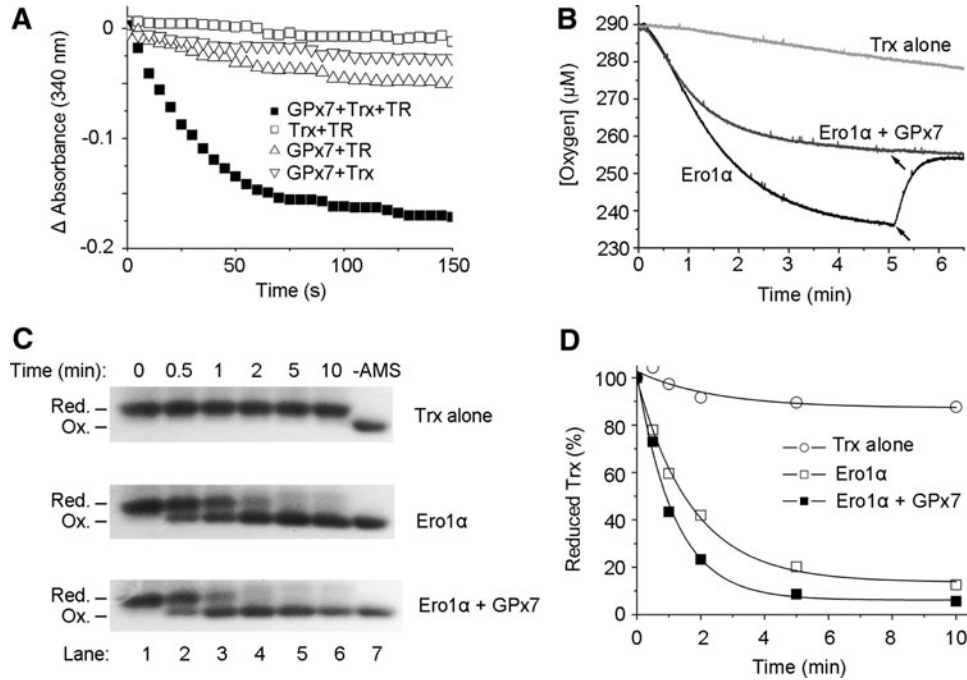

**SUPPLEMENTARY FIG. S1. Glutathione peroxidase 7 (GPx7) exhibits TGPx activity and oxidizes thioredoxin by using Ero1 $\alpha$ -derived hydrogen peroxide ( $H_2O_2$ ).** (A) NADPH (0.15 mM) oxidation was carried out at 25°C by monitoring absorbance changes at 340 nm with addition of 40  $\mu$ M  $H_2O_2$ , in the presence or absence of 10  $\mu$ M *Escherichia coli* thioredoxin (Trx), 10  $\mu$ M thioredoxin reductase (TR), and 10  $\mu$ M GPx7, as indicated (2). (B) Oxygen consumption was monitored at 25°C, as reduced Trx (50  $\mu$ M) was re-oxidized alone or in the presence of 2  $\mu$ M Ero1 $\alpha$ , or combined with 10  $\mu$ M GPx7. Catalase was added at the indicated time points (arrows). Without GPx7, ~45  $\mu$ M  $O_2$  was consumed to oxidize 50  $\mu$ M Trx, and ~40  $\mu$ M  $H_2O_2$  can be detected on catalase added; with GPx7, 25  $\mu$ M  $O_2$  was consumed and no  $H_2O_2$  was detected at the end. (C) Parallel experiments were carried out as the same in (B), and at indicated time points, aliquots were taken out for quenching using 2 mM 4-acetamido-4'-maleimidylstilbene-2,2'-disulfonic acid (AMS). The samples were analyzed by sodium dodecyl sulfate-15% polyacrylamide gel electrophoresis (SDS-15% PAGE) and visualized by Coomassie staining to determine the reduced (Red.) and oxidized (Ox.) Trx. Reduced Trx without AMS treatment (-AMS) was loaded as control. (D) The reduced fractions at each time point in (C) were quantified by densitometry using ImageJ software and plotted as the percent remaining relative to 0 min.
