# Supplementary material
Source: PubMed Central journal article supplement (PMC3901321)
Supplement: Supp_Figure2.pdf [file Supp_Figure2.pdf]

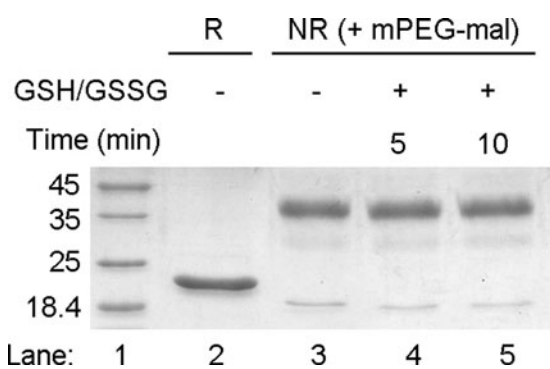

**SUPPLEMENTARY FIG. S2. GPx7 cannot be oxidized by the GSSG/GSH redox buffer.** 20  $\mu$ M GPx7 proteins were incubated with or without reduced/oxidized glutathione (GSH/GSSG) redox buffer (1/0.2 mM) for indicated time points. Free thiols were then blocked by adding nonreducing (NR) 2 $\times$ SDS-loading buffer containing 10 mM methoxy polyethylene glycol 5000 maleimide (mPEG-mal) (lanes 3–5) and resolved by SDS-15% PAGE and Coomassie staining. After alkylation by mPEG-mal, the mobility of GPx7 was significantly slowed down, and GSH/GSSG showed no effect on the redox states of GPx7.
