# Supplementary material
Source: PubMed Central journal article supplement (PMC3901321)
Supplement: Supp_Figure4.pdf [file Supp_Figure4.pdf]

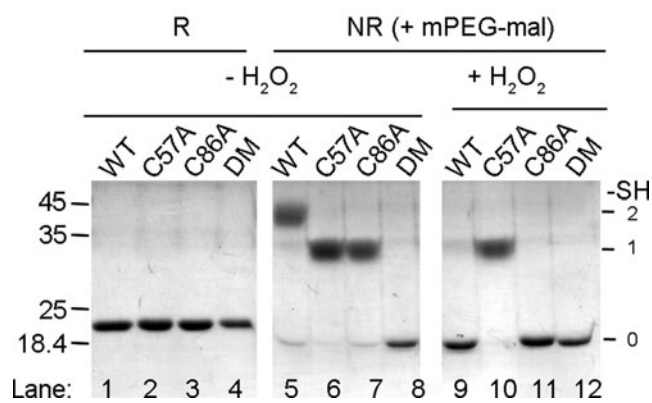

**SUPPLEMENTARY FIG. S4. Cys57 is responsible for H<sub>2</sub>O<sub>2</sub> reaction.** The indicated GPx7 variants (20  $\mu$ M) were incubated without (*lanes 1–8*) or with 40  $\mu$ M H<sub>2</sub>O<sub>2</sub> (*lanes 9–12*). Samples were then treated by adding NR 2 $\times$ SDS-loading buffer containing 10 mM mPEG-mal (*lanes 5–12*) or reducing (R) SDS-loading buffer (*lanes 1–4*), and resolved by SDS-15% PAGE. The numbers of thiols modified by mPEG-mal were indicated on the right margin.
