# Supplementary material
Source: PubMed Central journal article supplement (PMC3901321)
Supplement: Supp_Figure5.pdf [file Supp_Figure5.pdf]

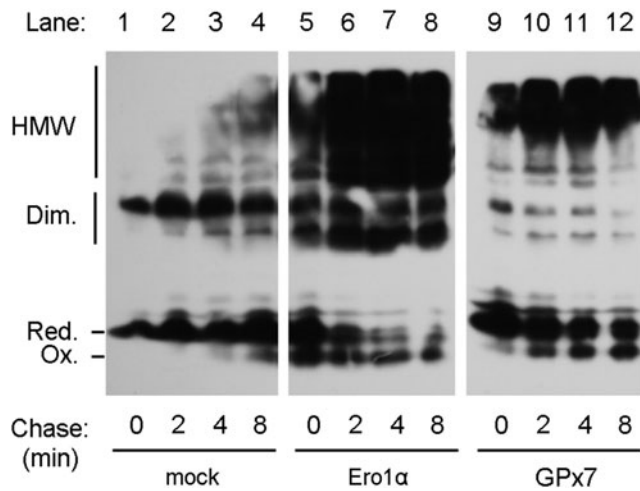

**SUPPLEMENTARY FIG. S5. GPx7 accelerates oxidative protein folding *in vivo*.** The myc-tagged Ig-J chains (JcM) re-oxidation was followed as the same in Figure 5A, detected by Western blots (WB) with a prolonged exposure to display more clearly the high-molecular-weight complexes (HMW), homodimers (Dim.), and oxidized monomers (Ox.) of JcM.
