# Supplementary material
Source: PubMed Central journal article supplement (PMC3901321)
Supplement: Supp_Figure6.pdf [file Supp_Figure6.pdf]

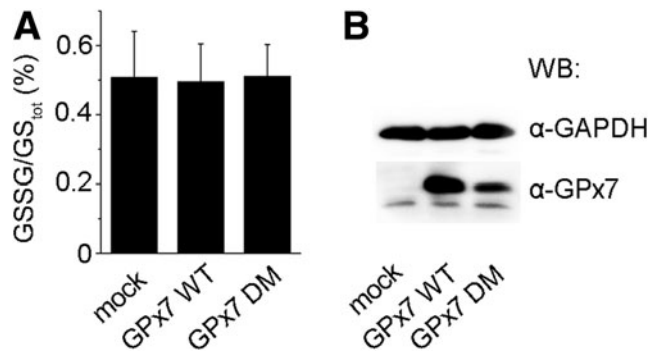

**SUPPLEMENTARY FIG. S6. Cellular ratio of oxidized to total glutathione (GSSG/GS<sub>tot</sub>) at steady state is not changed by overexpression of GPx7. (A)** HeLa transfectants, as indicated, were harvested, washed twice by PBS, and lysed in 1% 5-sulfosalicylic acid on ice. The supernatant was incubated with or without 2-vinylpyridine to determine concentrations of GSSG or GS<sub>tot</sub> as described (1). The percentage of GSSG/GS<sub>tot</sub> at a steady state was shown as mean ± S.D. (*n*=3). **(B)** A fraction of HeLa transfectants was lysed in radio immunoprecipitation assay buffer and analyzed by WB with anti-GPx7 and anti-glyceraldehyde 3-phosphate dehydrogenase.
